# Supplementary material for: Age- and Sex-Specific Differences in Lyme Disease Health-Related Behaviors, Ontario, Canada, 2015–2022
Source: Emerg Infect Dis. 2024 Oct;30(10):2006–15. doi: 10.3201/eid3010.240191 (PMC11431918; doi:10.3201/eid3010.240191)
Supplement: Appendix — Additional information on differences by age and sex in Lyme disease health-related behaviors in Ontario, Canada, 2015–2022 [file 24-0191-Techapp-s1.pdf]

EID cannot ensure accessibility for supplementary materials supplied by authors. Readers who have difficulty accessing supplementary content should contact the authors for assistance.

# Age- and Sex-Specific Differences in Lyme Disease Health-Related Behaviors, Ontario, Canada, 2015–2022

## Appendix

**Appendix Table.** Case definitions used in study

| Confirmed                                                                                                                                                | Probable                                                                                                                                                      |
|----------------------------------------------------------------------------------------------------------------------------------------------------------|---------------------------------------------------------------------------------------------------------------------------------------------------------------|
| Clinician-confirmed <i>Erythema migrans</i> >5 cm in diameter with a history of residence in, or visit to, a Lyme disease endemic area or risk area      | Clinical evidence of Lyme disease with laboratory support by serologic methods, but with no history of residence in, or visit to an endemic area or risk area |
| OR                                                                                                                                                       | OR                                                                                                                                                            |
| Clinical evidence of Lyme disease with laboratory confirmation by PCR or culture                                                                         | Clinician-confirmed <i>Erythema migrans</i> >5 cm in diameter but with no history of residence in, or visit to an endemic area or risk area                   |
| OR                                                                                                                                                       |                                                                                                                                                               |
| Clinical evidence of Lyme disease with laboratory support by serologic methods, and a history of residence in, or visit to, an endemic area or risk area |                                                                                                                                                               |

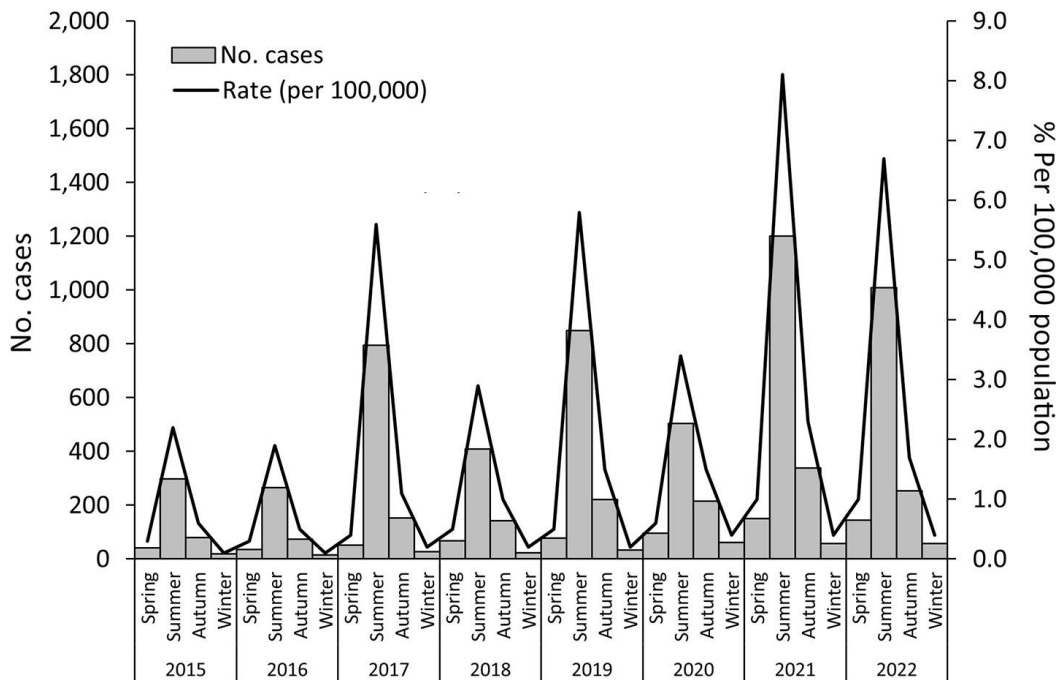

**Appendix Figure 1.** Seasonality of Lyme disease in Ontario, Canada (2015–2022). Denominator used in rate calculation includes annual population estimates. Seasons. Spring: March–May, Summer: June–August; Autumn: September–November; Winter: December–February.

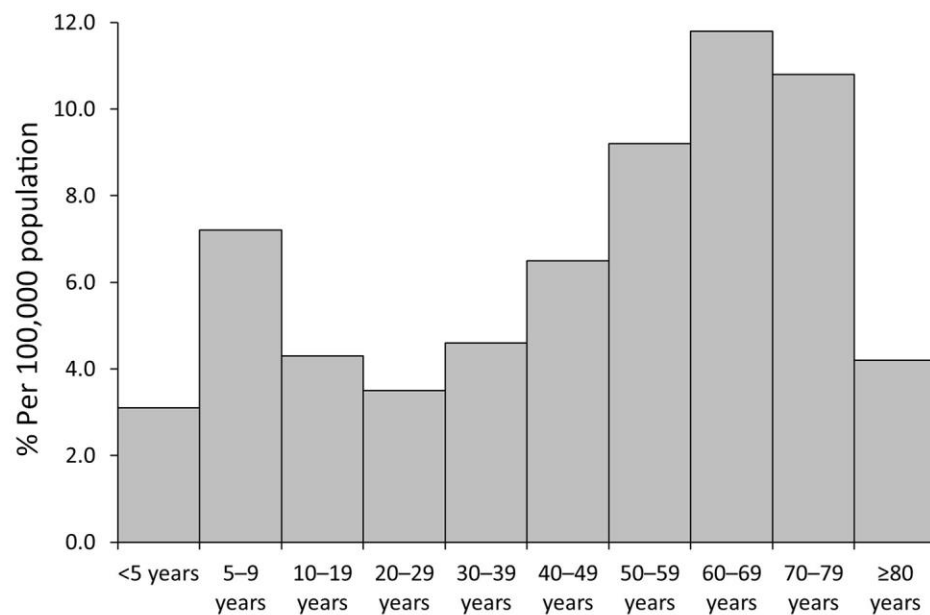

**Appendix Figure 2.** Average annual rate per 100,000 population of Lyme disease in Ontario, Canada (2015–2022) by age group.
